# Supplementary material
Source: Royal Society of Chemistry journal article supplement (doi:10.1039/d6ta03989h)
Supplement: d6ta03989h1.pdf [file d6ta03989h1.pdf]

# Supporting Information

Disorder-Driven Current Filamentation and Electro–Thermal Instability in  
Halide Solid Electrolytes:

A Disordered Network Model with Impedance Signatures

Dongwook Lee<sup>1,\*</sup>      Jiwon Seo<sup>1,\*\*</sup>

<sup>1</sup>Department of Physics and Engineering Physics, Yonsei University  
MIRAE Campus,  
Wonju-si, Gangwon-do 26493, Republic of Korea

\*Corresponding author: dongwookleed1324@yonsei.ac.kr

\*\*Corresponding author: jiwonseo@yonsei.ac.kr

## Contents

|    |                                                                           |           |
|----|---------------------------------------------------------------------------|-----------|
|    | <b>S1 Control model comparison</b>                                        | <b>2</b>  |
|    | <b>S2 Ensemble AC impedance — DC and AC correlation</b>                   | <b>3</b>  |
|    | <b>S3 High-resolution <math>\sigma_E</math> scan near peak</b>            | <b>4</b>  |
| 5  | <b>S4 Finite-size scaling — fit form comparison</b>                       | <b>5</b>  |
|    | <b>S5 3D instability boundary: <math>N = 25, 40, 50</math> comparison</b> | <b>6</b>  |
|    | <b>S6 Thermal criterion: physical parameter table</b>                     | <b>8</b>  |
|    | <b>S7 Capacitance exponent sensitivity</b>                                | <b>9</b>  |
|    | <b>S8 Model parameter summary</b>                                         | <b>10</b> |
| 10 | <b>S9 Disorder distribution sensitivity</b>                               | <b>11</b> |

## S1 Control model comparison

To assess the role of the pathway-suppression noise  $\eta_i$  in the full model (Model A+B), three model variants are compared at  $N = 15$  (8 seeds each):

- **Model A** (pure Arrhenius):  $g_i = g_0 \exp(-E_{a,i}/k_B T)$  with Gaussian  $E_{a,i}$  disorder only; no  $\eta_i$  term. This is the *core model* used in the main text.
- **Model A+B** (full model): adds the exponential suppression factor  $\exp(-\eta_i)$  as described in the main text.
- **Model C** (correlated): spatially correlated Gaussian  $E_a$  field (correlation length 3 lattice units); no  $\eta_i$  term.

Fig. S1 shows that Model A already produces strong filamentation with a peak near  $\sigma_E \approx 0.16$  eV, reaching  $\Phi \approx 11.8$ . Model A+B enhances the peak by  $\approx 6\%$  without shifting its location; all main-text figures use Model A. Model C produces qualitatively different behaviour (broader, shifted peak), confirming that the peaked shape reflects uncorrelated activation-energy statistics, not a model construction artifact.

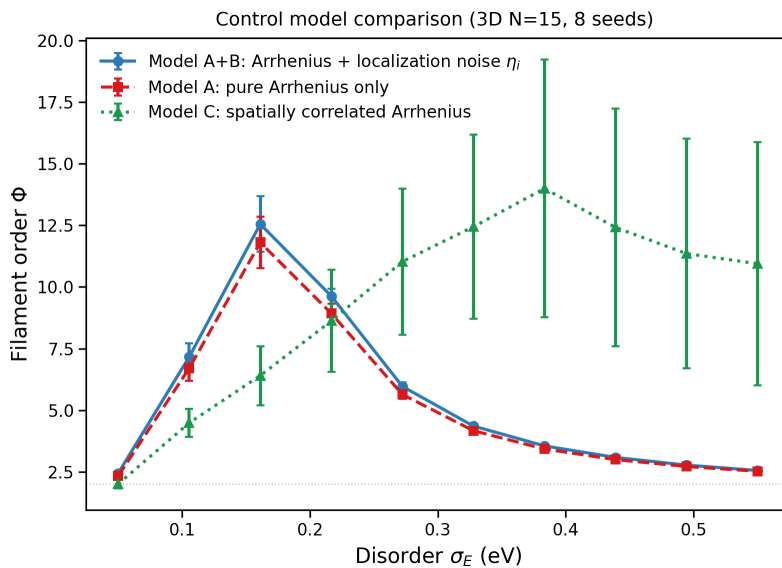

**Figure S1.** Control model comparison (3D,  $N = 15$ , 8 seeds each). Model A (red dashed) and Model A+B (blue solid) peak at the same  $\sigma_E$  and differ by  $\approx 6\%$  in amplitude. Model C (green dotted) shows qualitatively different behaviour. Error bars: 1 SE.

## 25 S2 Ensemble AC impedance — DC and AC correlation

Fig. S2 shows AC impedance spectra and the DC–AC correlation computed from the same 3D disordered networks ( $N = 15$ , 15 realisations each) with  $C_{ij} \propto g_{ij}^{0.3}$ .

Panel S2a shows ensemble-averaged Nyquist plots for four disorder values. Panel S2b shows that the DRT proxy width peaks near  $\sigma_E \approx 0.25$  eV, approximately 0.10 eV above the  $\Phi$  peak ( $\sigma_E \approx 0.15$  eV). At the  $\Phi$  peak, current is concentrated in fast filaments with relatively uniform RC time constants; the DRT broadens maximally at slightly higher disorder when the resistance landscape is most heterogeneous. Panel S2c shows the  $\Phi$ –DRT scatter (Pearson  $r = 0.71$ ), confirming a moderate positive correlation.

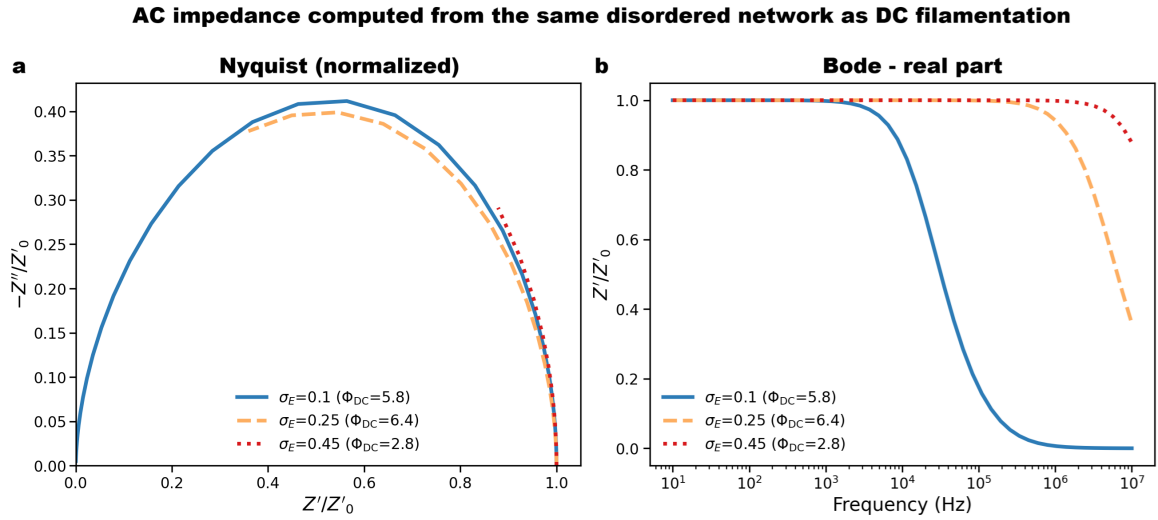

**Figure S2.** Ensemble AC impedance ( $N = 15$ , 15 seeds). (a) Ensemble-averaged Nyquist plots. (b) DRT proxy width vs  $\sigma_E$ . (c)  $\Phi$  vs DRT width scatter; Pearson  $r = 0.71$ .

35 Extended calculations at  $N = 20$  and  $N = 25$  (5 seeds each) are shown in Fig. S6; the key result is that the non-monotonic DRT broadening trend is preserved across all three system sizes.

### S3 High-resolution $\sigma_E$ scan near peak

The coarse FSS grid ( $\Delta\sigma_E \approx 0.045$  eV) places the peak at the second of twelve sampled values. To verify this is a genuine interior maximum, a dedicated high-resolution scan was performed over  $\sigma_E = 0.08$ – $0.26$  eV with  $\Delta\sigma_E \approx 0.018$  eV (15 points), at  $N = 40$  with 20 seeds each.

Fig. S3 shows the result. The refined peak is at  $\sigma_E = 0.170$  eV ( $\Phi = 11.26 \pm 0.15$ ), clearly interior to the scanned range with both flanks well resolved. The coarse-grid data agree with the high-resolution scan where they overlap. No boundary artifact is present.

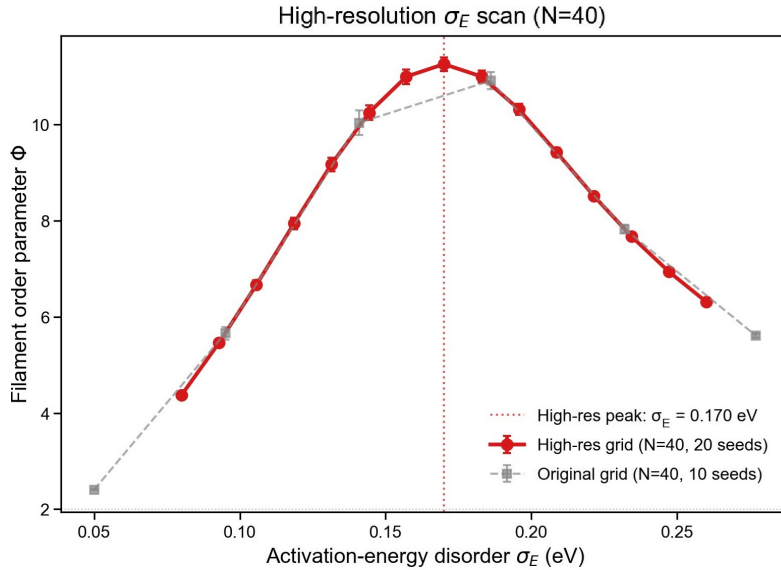

**Figure S3.** High-resolution  $\sigma_E$  scan ( $N = 40$ , 20 seeds, red circles). Coarse grid ( $N = 40$ , 10 seeds, grey squares) shown for comparison. Refined peak at  $\sigma_E = 0.170$  eV ( $\Phi = 11.26$ ). Error bars: 1 SE.

## S4 Finite-size scaling — fit form comparison

The main text uses  $\Phi(N) = \Phi_\infty + A/N$ . Fig. S4 compares three fit forms on peak  $\Phi$  data for  $N = 20\text{--}60$  (6 points, weighted by inverse SE):

- **Form 1** (linear  $1/N$ ):  $\Phi(N) = \Phi_\infty + A/N$ . Direct fit:  $\Phi_\infty = 10.64 \pm 0.16$ ; bootstrap:  $\Phi_\infty = 10.52 \pm 0.20$  (used in main text). AIC = 7.9.
- **Form 2** (power law):  $\Phi(N) = \Phi_\infty + A/N^\omega$ .  $\Phi_\infty = 10.82 \pm 0.31$ ,  $\omega = 1.85$ , AIC = 8.9. Additional parameter not justified by AIC.
- **Form 3** (quadratic):  $\Phi(N) = \Phi_\infty + A/N + B/N^2$ .  $\Phi_\infty = 11.45 \pm 0.55$ , AIC = 7.5. Larger uncertainty reflects overfitting with 6 data points.

All three forms yield  $\Phi_\infty = 10.6\text{--}11.5$ , consistent within quoted uncertainties. The linear form is the most parsimonious and is used in the main text.

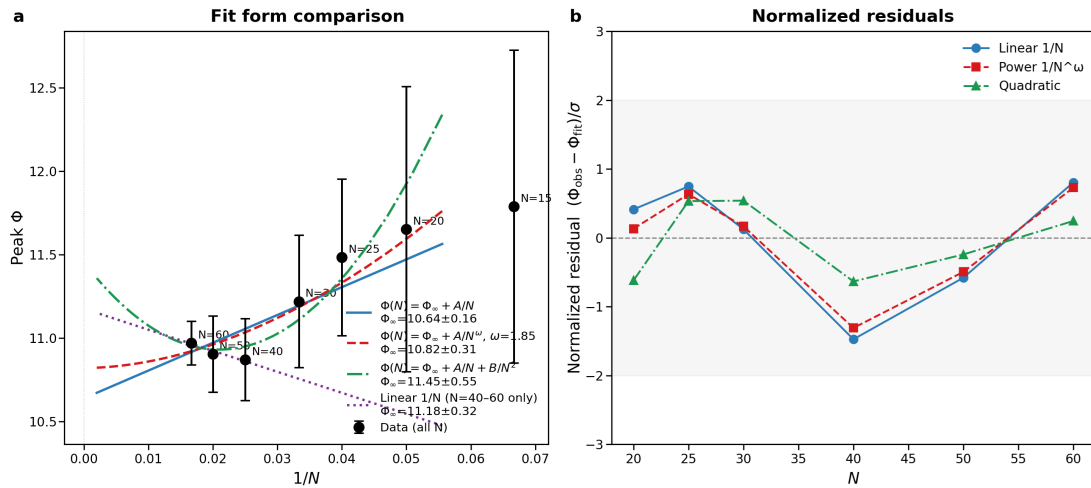

**Figure S4.** FSS fit form comparison. (a) Peak  $\Phi$  vs  $1/N$  for  $N = 20\text{--}60$ ; linear (blue), power-law (red dashed), quadratic (green) fits. Star:  $\Phi_\infty = 10.52 \pm 0.20$ . (b) Normalised residuals.

## S5 3D instability boundary: $N = 25, 40, 50$ comparison

Fig. S5 documents the finite-size dependence of the 3D  $V_{\text{crit}}$  boundary.

60 Panel S5a shows  $V_{\text{crit}}(\sigma_E)$  for  $N = 25$  (10 seeds),  $N = 40$  (6 seeds), and  $N = 50$  (4 seeds). The instability onset  $\sigma_E \approx 0.22$  eV is identical for all three sizes, confirming robustness. The  $V_{\text{crit}}$  plateau increases monotonically: 1.17 V ( $N = 25$ ), 1.46 V ( $N = 40$ ), 1.75 V ( $N = 50$ ).

65 Panel S5b shows the plateau  $V_{\text{crit}}$  vs  $1/N$ ; a linear fit ( $R^2 = 0.92$ ) extrapolates to a model-defined threshold of  $\sim 2.2$  V. This is a dimensionless network voltage and is not directly comparable to a full cell voltage; its practical interpretation requires calibration of the local electrolyte potential drop for specific cell geometries.

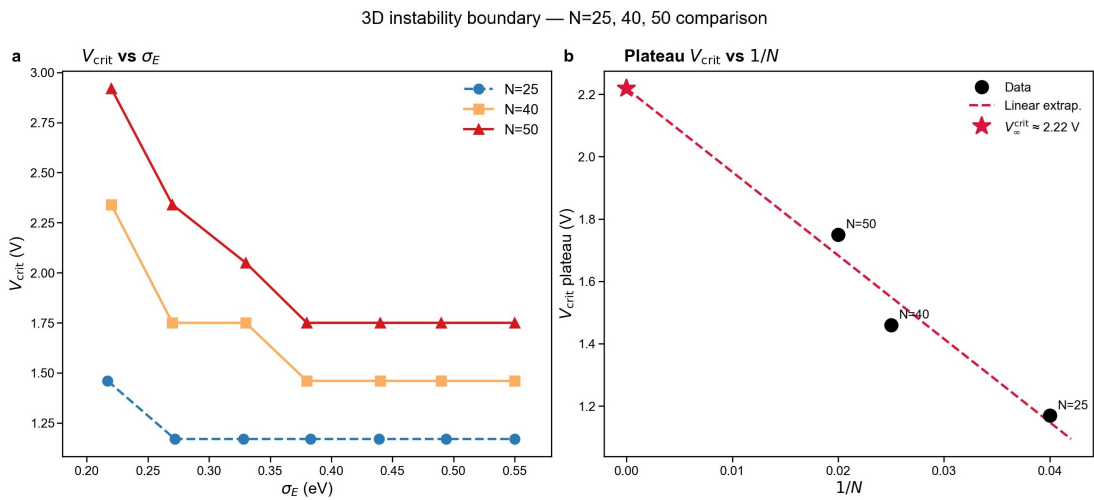

**Figure S5.** 3D  $V_{\text{crit}}$  finite-size comparison. (a)  $V_{\text{crit}}$  vs  $\sigma_E$  for  $N = 25, 40,$  and  $50$ . Onset disorder ( $0.22$  eV) identical across sizes. (b) Plateau  $V_{\text{crit}}$  vs  $1/N$ ; model threshold  $\sim 2.2$  V ( $R^2 = 0.92$ ; network voltage, not full cell voltage).

## Extended impedance analysis: $N = 15, 20, 25$ comparison

Fig. S6 extends the DC–AC analysis from Section S2 to  $N = 20$  and  $N = 25$  (5 seeds each).

70 The DRT width non-monotonic trend—rising then falling with  $\sigma_E$ —is preserved across all three system sizes (Fig. S6a), confirming it is not a finite-size artifact. The Pearson correlation decreases modestly with  $N$ :  $r = 0.71$  ( $N = 15$ ),  $0.68$  ( $N = 20$ ),  $0.61$  ( $N = 25$ ). This decrease is expected because  $\Phi$  grows substantially with  $N$  while the DRT width variation ( $\sim 0.4$  decades) remains moderate; the 5-seed ensembles for larger sizes carry  
75 greater statistical uncertainty. The qualitative conclusion—a moderate positive correlation between DC filamentation and AC DRT broadening—is consistent across all sizes.

DC-AC correlation across system sizes  $N=15, 20, 25$

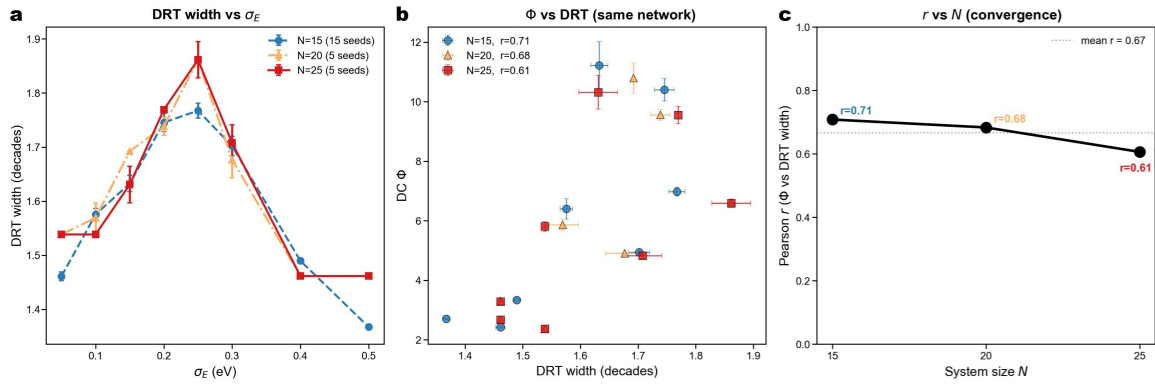

**Figure S6.** DC-AC correlation across system sizes  $N = 15, 20, 25$ . (a) DRT width vs  $\sigma_E$ ; non-monotonic peak preserved. (b)  $\Phi$  vs DRT scatter; Pearson  $r$  decreases from 0.71 to 0.61 with increasing  $N$ , reflecting growth of the  $\Phi$  range. (c)  $r$  vs  $N$ .  $N = 20, 25$ : 5 seeds;  $N = 15$ : 15 seeds.

## S6 Thermal criterion: physical parameter table

Table S1 provides the physical parameter estimates used to convert dimensionless network power  $Q_i$  to the normalised instability criterion  $\theta_i = Q_i/Q_{\text{crit}}$ .

80 The thermal conductance per node is estimated as:

$$G_{\text{th}} \sim \frac{k_{\text{th}} A_{\text{node}}}{\ell} = k_{\text{th}} \frac{L}{N}, \quad (\text{S1})$$

where  $\ell = L/N$  is the node length and  $A_{\text{node}} = \ell^2$ . Note the conductance scales as  $k_{\text{th}}L/N$  (not  $k_{\text{th}}N/L$ ) because a larger node presents a larger cross-section. This expression is used only to set an order-of-magnitude threshold.

It is emphasised that  $Q_{\text{crit}}$  is a calibration parameter within the dimensionless network, 85 not derived from first principles; its sensitivity is verified over a factor-of-three range.

**Table S1.** Physical parameters for the thermal criterion.

| Quantity               | Symbol                        | Value                        | Unit                                            | Source                                             |
|------------------------|-------------------------------|------------------------------|-------------------------------------------------|----------------------------------------------------|
| Electrolyte thickness  | $L$                           | 100                          | $\mu\text{m}$                                   | Typical dense pellet                               |
| Thermal conductivity   | $k_{\text{th}}$               | 0.5–1.5                      | $\text{W m}^{-1} \text{K}^{-1}$                 | Lit. halides [1, 2]                                |
| Allowable $\Delta T$   | $\Delta T_{\text{max}}$       | 30–100                       | K                                               | Degradation onset [3]                              |
| Ionic conductivity     | $\sigma_{\text{ion}}$         | 0.1–1.0                      | $\text{mS cm}^{-1}$                             | Lit. halides                                       |
| Applied field          | $E = V/L$                     | 3–35                         | $\text{kV m}^{-1}$ (= 3–35 $\text{V mm}^{-1}$ ) | $V = 0.3\text{--}3.5$ across $L = 100 \mu\text{m}$ |
| Current density        | $J = \sigma_{\text{ion}}E$    | 3–350                        | $\text{mA cm}^{-2}$                             | Derived                                            |
| Volumetric dissipation | $q = J^2/\sigma_{\text{ion}}$ | $10^5\text{--}10^8$          | $\text{W m}^{-3}$                               | Derived                                            |
| Normalised threshold   | $\theta = 1$ level            | $2\text{--}5 \times 10^{-3}$ | (dim.less)                                      | Order-of-magnitude                                 |
| Value used             | $Q_{\text{crit}}$             | $2.97 \times 10^{-3}$        | (dim.less)                                      | Within estimated range                             |

The sensitivity of the phase-diagram topology to  $Q_{\text{crit}}$  was tested over a factor-of-three range ( $1\text{--}6 \times 10^{-3}$ ). The qualitative structure—three regimes, monotonic decrease of  $V_{\text{crit}}$  with  $\sigma_E$ , and the plateau—is unchanged. The absolute  $V_{\text{crit}}$  shifts by  $\approx \pm 20\%$  over this range.

## 90 S7 Capacitance exponent sensitivity

The assignment  $C_{ij} \propto g_{ij}^\alpha$  is phenomenological;  $\alpha = 0.3$  was chosen as a mild correlation value. Fig. S7 compares the DRT proxy width vs  $\sigma_E$  for  $\alpha = 0, 0.3, 0.5, 1.0$  (all at  $N = 8, 4$  seeds).

Fig. S7a shows that the absolute DRT width and peak location shift with  $\alpha$  at small system size. Fig. S7b shows the same data normalised to each curve's peak. The non-monotonic shape is preserved for  $\alpha = 0, 0.3,$  and  $0.5$ ; the qualitative trend is therefore a property of the network's disorder structure, not an artifact of the capacitance parameterisation. For  $\alpha = 1.0$  the trend flattens at larger disorder, motivating the choice  $\alpha = 0.3$  in the main text.

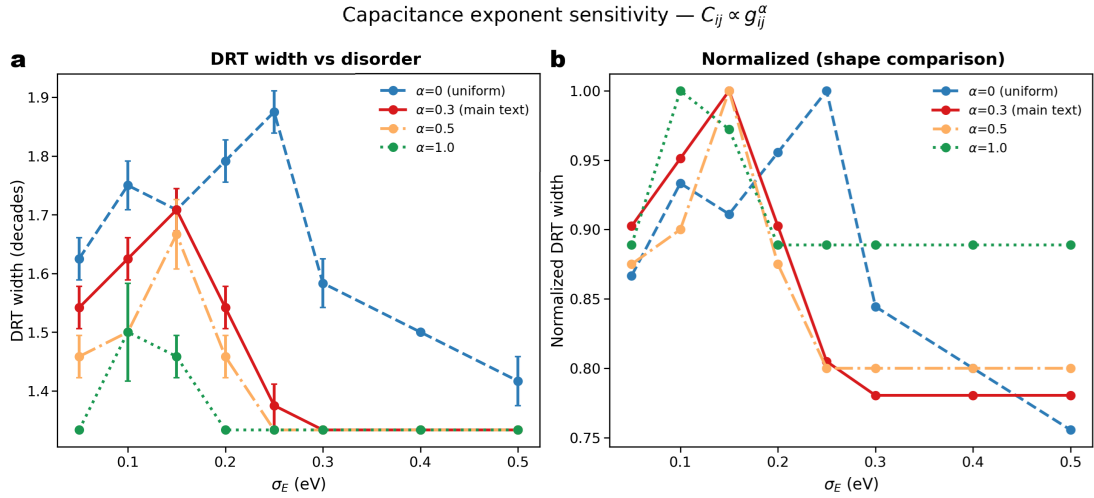

**Figure S7.** Capacitance exponent sensitivity ( $C_{ij} \propto g_{ij}^\alpha$ ,  $N = 8, 4$  seeds). (a) DRT width vs  $\sigma_E$  for  $\alpha = 0, 0.3, 0.5, 1.0$ . (b) Normalised data; non-monotonic broadening preserved for  $\alpha \leq 0.5$ .

100 **S8 Model parameter summary**

**Table S2.** Summary of model parameters.

| Parameter                 | Symbol            | Value                 | Notes                                     |
|---------------------------|-------------------|-----------------------|-------------------------------------------|
| Mean activation energy    | $\bar{E}_a$       | 0.30 eV               | Representative halide                     |
| Temperature               | $T$               | 300 K                 | Room temperature                          |
| Percolation threshold     | $\sigma_c$        | 0.70 eV               | Model parameter                           |
| Correlation exponent (3D) | $\nu$             | 0.88                  | 3D percolation universality               |
| Correlation exponent (2D) | $\nu$             | 1.00                  | 2D percolation universality               |
| 3D system sizes (FSS)     | $N$               | 15,20,25,30,40,50,60  | $N^3$ nodes each                          |
| Seeds per point (FSS)     | $n_s$             | 20                    | SE < 5%                                   |
| 2D system sizes           | $N$               | up to 100             | $N^2$ nodes                               |
| Phase diagram seeds (3D)  | $n_s$             | 4–10                  | $N = 25$ : 10; $N = 40$ : 6; $N = 50$ : 4 |
| Instability threshold     | $Q_{\text{crit}}$ | $2.97 \times 10^{-3}$ | See Table S1                              |
| Capacitance exponent      | $\alpha$          | 0.3                   | Phenomenological; see Fig. S7             |

## S9 Disorder distribution sensitivity

The main text uses a Gaussian activation-energy disorder distribution, which is the standard choice for thermally activated hopping in disordered solids. Fig. S8 compares  $\Phi(\sigma_E)$  for four distributions at  $N = 15$  (5 seeds each), all with the same mean  $\bar{E}_a = 0.30$  eV and the same standard deviation  $\sigma_E$ : Gaussian (main text), exponential (one-sided, heavier tail), uniform ( $\pm\sqrt{3}\sigma_E$  range), and bimodal (two Gaussians centred at  $E_a = \bar{E}_a \pm \sigma_E$ , each with width  $\sigma_E/2$ ).

Fig. S8a shows that the peak amplitude and location depend on the distribution choice: the exponential distribution shifts the peak to  $\sigma_E \approx 0.30$  eV with lower amplitude (Pearson  $r$  between tail weight and peak shift); the uniform distribution gives an intermediate peak at  $\sigma_E \approx 0.20$  eV; the bimodal distribution yields a sharp peak at  $\sigma_E \approx 0.15$  eV. Fig. S8b shows the same data normalised to each curve's peak value. The key observation is that the non-monotonic topology— $\Phi$  rises then falls with  $\sigma_E$ —is preserved for all four distributions. The Gaussian choice is therefore not anomalous; the qualitative conclusion is generic across disorder distribution families.

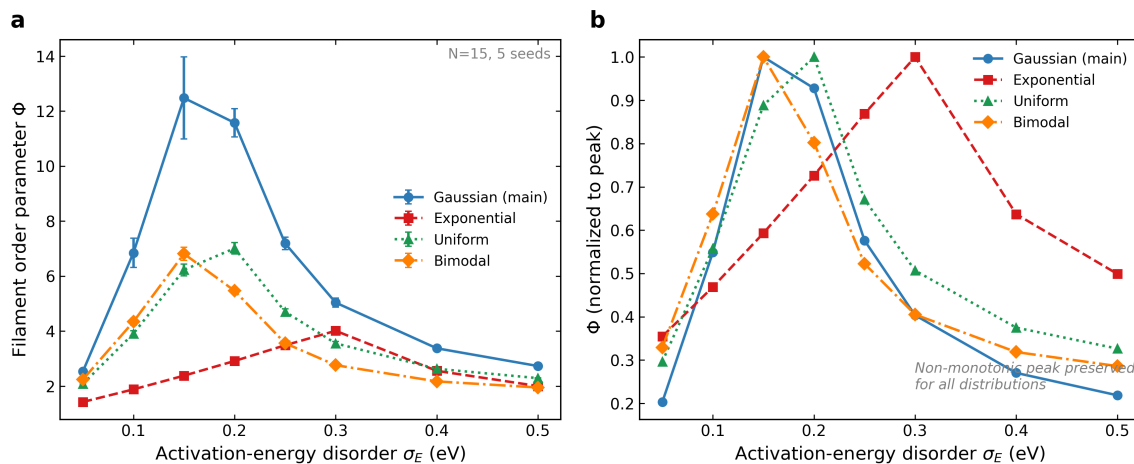

**Figure S8.** Disorder distribution sensitivity ( $N = 15$ , 5 seeds each). (a)  $\Phi(\sigma_E)$  for Gaussian (main text), exponential, uniform, and bimodal activation-energy distributions. Peak position and amplitude shift with distribution choice, but the non-monotonic topology is preserved in all cases. (b) Same data normalised to each curve's peak, confirming the qualitative robustness of the filamentation mechanism.

## References

- [1] J. Janek, W. G. Zeier, A solid future for battery development, *Nat. Energy* **1** (2016) 16141.
- [2] T. Famprikis, P. Canepa, J. A. Dawson, M. S. Islam, C. Masquelier, Fundamentals of inorganic solid-state electrolytes for batteries, *Nat. Mater.* **18** (2019) 1278–1291.
- [3] Z. Song, T. Wang, H. Yang, W. H. Kan, Y. Chen, Q. Yu, L. Wang, Y. Zhang, Y. Dai, H. Chen, W. Yin, T. Honda, M. Avdeev, H. Xu, J. Ma, Y. Huang, W. Luo, Promoting high-voltage stability through local lattice distortion of halide solid electrolytes, *Nat. Commun.* **15** (2024) 1481.

- 125 [4] M. Saccoccio, T. H. Wan, C. Chen, F. Ciucci, Optimal regularization in distribution  
of relaxation times applied to electrochemical impedance spectroscopy: ridge and lasso  
regression methods – a theoretical and experimental study, *Electrochim. Acta* **147**  
(2014) 470–482.
- 130 [5] T. H. Wan, M. Saccoccio, C. Chen, F. Ciucci, Influence of the discretization methods on  
the distribution of relaxation times deconvolution: implementing radial basis functions  
with DRTtools, *Electrochim. Acta* **184** (2015) 483–499.
